# Supplementary material for: Particulate inorganic carbon pools by coccolithophores in low-oxygen–low-pH waters off the Southeast Pacific margin
Source: Copernicus journal article supplement (doi:10.5194/bg-22-4405-2025), 2025-09-04
Supplement: Supplementary file 1 [file bg-22-4405-2025-supplement.pdf]

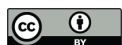

*Supplement of*

## **Particulate inorganic carbon pools by coccolithophores in low-oxygen–low-pH waters off the Southeast Pacific margin**

**Francisco Javier Díaz-Rosas et al.**

*Correspondence to:* Francisco Javier Díaz-Rosas (fjdiaz4@uc.cl)

The copyright of individual parts of the supplement might differ from the article licence.

## Supplementary Section S1. Tables

**Table S1: Coccolith length measurements used to estimate specific  $\text{PIC}_{\text{Cocco}}$  quotas.**

| Species or genus                | Length<br>( $\mu\text{m}$ ) | Volume<br>( $\mu\text{m}^3$ ) | Mass<br>(pg) | Coccoliths<br>measured |
|---------------------------------|-----------------------------|-------------------------------|--------------|------------------------|
| <i>Gephyrocapsa parvula</i>     | $2.0 \pm 0.1$               | 0.4                           | 1.0          | 6                      |
| <i>Gephyrocapsa huxleyi</i>     | $3.6 \pm 0.3$               | 0.9                           | 2.5          | 20                     |
| <i>Gephyrocapsa oceanica</i>    | $5.2 \pm 0.6$               | 6.9                           | 18.7         | 20                     |
| <i>Helicosphaera</i> spp.       | $9.0 \pm 1.1$               | 36.9                          | 99.7         | 20                     |
| <i>Oolithotus</i> spp.          | $4.5 \pm 0.4$               | 6.2                           | 16.8         | 20                     |
| <i>C. leptoporus</i> large-type | $8.1 \pm 0.9$               | 41.9                          | 113.0        | 20                     |
| <i>C. leptoporus</i> small-type | $3.9 \pm 0.4$               | 4.7                           | 12.6         | 11                     |
| <i>Syracosphaera</i> spp.       | $3.7 \pm 0.2$               | 0.8                           | 2.0          | 2                      |
| <i>Acanthoica</i> spp.          | $4.0 \pm 0.3$               | 1.9                           | 5.2          | 5                      |
| <i>Discosphaera tubifera</i>    | $1.6 \pm 0.1$               | 0.3                           | 0.8          | 2                      |
| <i>Umbellosphaera</i> spp.      | $5.7 \pm 0.6$               | 2.7                           | 7.4          | 7                      |
| <i>Umbilicosphaera</i> spp.     | $4.7 \pm 0.6$               | 5.1                           | 13.9         | 7                      |

5 **Table S2: Pairwise comparisons of surface PIC values among the OMZ and other regions based on robust ANOVA with 20 % trimmed means (Yuen's method). The table includes test statistics, 95 % confidence intervals, p-values, and significance levels ( $p < 0.05$  marked with asterisks). OMZ – Oxygen Minimum Zone; ATL – Atlantic Ocean; SOC – Southern Ocean; IND – Indian Ocean; ART – Western Arctic; PAT – Patagonian Shelf.**

| Comparison | Test statistic | CI_lower | CI_upper | <i>p</i> -value | Significance |
|------------|----------------|----------|----------|-----------------|--------------|
| OMZ vs ATL | -0.329         | -0.646   | 0.137    | 0.0496          | *            |
| OMZ vs SOC | -3.552         | -4.669   | -2.575   | <0.001          | ***          |
| OMZ vs IND | -1.637         | -2.075   | -1.151   | <0.001          | ***          |
| OMZ vs ART | 0.104          | -0.262   | 0.565    | 0.497           | ns           |
| OMZ vs PAT | -3.543         | -4.257   | -2.833   | <0.001          | ***          |
| ATL vs SOC | -3.224         | -4.33    | -2.353   | <0.001          | ***          |
| ATL vs IND | -1.308         | -1.586   | -1.047   | <0.001          | ***          |
| ATL vs ART | 0.433          | 0.254    | 0.591    | <0.001          | ***          |
| ATL vs PAT | -3.214         | -3.842   | -2.668   | <0.001          | ***          |
| SOC vs IND | 1.915          | 1.026    | 3.024    | <0.001          | ***          |
| SOC vs ART | 3.656          | 2.778    | 4.762    | <0.001          | ***          |
| SOC vs PAT | 0.009          | -1.091   | 1.195    | 0.972           | ns           |
| IND vs ART | 1.741          | 1.449    | 2.057    | <0.001          | ***          |
| IND vs PAT | -1.906         | -2.596   | -1.27    | <0.001          | ***          |
| ART vs PAT | -3.647         | -4.265   | -3.093   | <0.001          | ***          |

**Table S3: Pairwise comparisons of surface POC values among the OMZ and other regions based on robust ANOVA with 20 % trimmed means (Yuen’s method). The table includes test statistics, 95 % confidence intervals, *p*-values, and significance levels (*p* < 0.05 marked with asterisks). OMZ – Oxygen Minimum Zone; ATL – Atlantic Ocean; SOC – Southern Ocean; IND – Indian Ocean; ART – Western Arctic; PAT – Patagonian Shelf.**

| Comparison | Test_statistic | CI_lower | CI_upper | <i>p</i> -value | Significance |
|------------|----------------|----------|----------|-----------------|--------------|
| OMZ vs ATL | -0.018         | -0.021   | -0.015   | <0.001          | ***          |
| OMZ vs SOC | -0.028         | -0.038   | -0.02    | <0.001          | ***          |
| OMZ vs IND | -0.034         | -0.039   | -0.03    | <0.001          | ***          |
| OMZ vs ART | 0.001          | -0.001   | 0.004    | 0.113           | ns           |
| OMZ vs PAT | -0.021         | -0.026   | -0.017   | <0.001          | ***          |
| ATL vs SOC | -0.01          | -0.02    | -0.002   | <0.001          | ***          |
| ATL vs IND | -0.016         | -0.02    | -0.012   | <0.001          | ***          |
| ATL vs ART | 0.019          | 0.017    | 0.022    | <0.001          | ***          |
| ATL vs PAT | -0.004         | -0.008   | 0.001    | 0.022           | *            |
| SOC vs IND | -0.006         | -0.014   | 0.005    | 0.116           | ns           |
| SOC vs ART | 0.03           | 0.022    | 0.039    | <0.001          | ***          |
| SOC vs PAT | 0.007          | -0.002   | 0.017    | 0.0384          | *            |
| IND vs ART | 0.035          | 0.032    | 0.04     | <0.001          | ***          |
| IND vs PAT | 0.012          | 0.007    | 0.018    | <0.001          | ***          |
| ART vs PAT | -0.023         | -0.028   | -0.019   | <0.001          | ***          |

**Table S4: Pairwise comparisons of surface PIC:POC ratios among the OMZ and other regions based on robust ANOVA with 20 % trimmed means (Yuen’s method). The table includes test statistics, 95 % confidence intervals, *p*-values, and significance levels (*p* < 0.05 marked with asterisks). OMZ – Oxygen Minimum Zone; ATL – Atlantic Ocean; SOC – Southern Ocean; IND – Indian Ocean; ART – Western Arctic; PAT – Patagonian Shelf.**

| Comparison | Test_statistic | CI_lower | CI_upper | <i>p</i> -value | Significance |
|------------|----------------|----------|----------|-----------------|--------------|
| OMZ vs ATL | -0.018         | -0.021   | -0.015   | <0.001          | ***          |
| OMZ vs SOC | -0.028         | -0.038   | -0.02    | <0.001          | ***          |
| OMZ vs IND | -0.034         | -0.039   | -0.03    | <0.001          | ***          |
| OMZ vs ART | 0.001          | -0.001   | 0.004    | 0.113           | ns           |
| OMZ vs PAT | -0.021         | -0.026   | -0.017   | <0.001          | ***          |
| ATL vs SOC | -0.01          | -0.02    | -0.002   | <0.001          | ***          |
| ATL vs IND | -0.016         | -0.02    | -0.012   | <0.001          | ***          |
| ATL vs ART | 0.019          | 0.017    | 0.022    | <0.001          | ***          |
| ATL vs PAT | -0.004         | -0.008   | 0.001    | 0.022           | *            |
| SOC vs IND | -0.006         | -0.014   | 0.005    | 0.116           | ns           |
| SOC vs ART | 0.03           | 0.022    | 0.039    | <0.001          | ***          |
| SOC vs PAT | 0.007          | -0.002   | 0.017    | 0.0384          | *            |
| IND vs ART | 0.035          | 0.032    | 0.04     | <0.001          | ***          |
| IND vs PAT | 0.012          | 0.007    | 0.018    | <0.001          | ***          |
| ART vs PAT | -0.023         | -0.028   | -0.019   | <0.001          | ***          |

**15 Table S5: Pairwise comparisons of subsurface PIC values among the OMZ and other regions based on robust ANOVA with 20 % trimmed means (Yuen’s method). The table includes test statistics, 95 % confidence intervals, *p*-values, and significance levels (*p* < 0.05 marked with asterisks). OMZ – Oxygen Minimum Zone; ATL – Atlantic Ocean; SOC – Southern Ocean; IND – Indian Ocean; ART – Western Arctic.**

| Comparison | Test_statistic | CI_lower | CI_upper | <i>p</i> -value | Significance |
|------------|----------------|----------|----------|-----------------|--------------|
| OMZ vs ATL | -0.44          | -0.631   | -0.255   | <0.001          | ***          |
| OMZ vs SOC | -3.368         | -7.418   | -1.381   | <0.001          | ***          |
| OMZ vs IND | -1.496         | -1.933   | -1.132   | <0.001          | ***          |
| OMZ vs ART | 0.005          | -0.281   | 0.249    | 0.956           | ns           |
| ATL vs SOC | -2.928         | -6.996   | -0.99    | <0.001          | ***          |
| ATL vs IND | -1.057         | -1.47    | -0.675   | <0.001          | ***          |
| ATL vs ART | 0.445          | 0.159    | 0.693    | <0.001          | ***          |
| SOC vs IND | 1.872          | -0.18    | 5.946    | 0.0108          | *            |
| SOC vs ART | 3.373          | 1.383    | 7.415    | <0.001          | ***          |
| IND vs ART | 1.501          | 1.06     | 1.944    | <0.001          | ***          |

20

**Table S6: Pairwise comparisons of subsurface POC values among the OMZ and other regions based on robust ANOVA with 20 % trimmed means (Yuen’s method). The table includes test statistics, 95 % confidence intervals, *p*-values, and significance levels (*p* < 0.05 marked with asterisks). OMZ – Oxygen Minimum Zone; ATL – Atlantic Ocean; SOC – Southern Ocean; IND – Indian Ocean; ART – Western Arctic.**

| Comparison | Test_statistic | CI_lower | CI_upper | <i>p</i> -value | Significance |
|------------|----------------|----------|----------|-----------------|--------------|
| OMZ vs ATL | 16.277         | 10.969   | 22.491   | <0.001          | ***          |
| OMZ vs SOC | 5.09           | -11.462  | 15.754   | 0.284           | ns           |
| OMZ vs IND | 18.048         | 10.725   | 25.529   | <0.001          | ***          |
| OMZ vs ART | 16.992         | 5.121    | 25.777   | <0.001          | ***          |
| ATL vs SOC | -11.187        | -27.788  | -1.81    | <0.001          | ***          |
| ATL vs IND | 1.771          | -4.186   | 6.645    | 0.373           | ns           |
| ATL vs ART | 0.714          | -10.164  | 6.915    | 0.834           | ns           |
| SOC vs IND | 12.958         | 1.907    | 30.034   | <0.001          | ***          |
| SOC vs ART | 11.901         | -2.549   | 29.061   | 0.0196          | *            |
| IND vs ART | -1.056         | -12.448  | 7.602    | 0.747           | ns           |

25

**Table S7: Pairwise comparisons of subsurface PIC:POC ratios among the OMZ and other regions based on robust ANOVA with 20 % trimmed means (Yuen’s method). The table includes test statistics, 95 % confidence intervals, *p*-values, and significance levels (*p* < 0.05 marked with asterisks). OMZ – Oxygen Minimum Zone; ATL – Atlantic Ocean; SOC – Southern Ocean; IND – Indian Ocean; ART – Western Arctic.**

| Comparison | Test_statistic | CI_lower | CI_upper | <i>p</i> -value | Significance |
|------------|----------------|----------|----------|-----------------|--------------|
| OMZ vs ATL | -0.032         | -0.039   | -0.026   | <0.001          | ***          |
| OMZ vs SOC | -0.078         | -0.163   | -0.038   | <0.001          | ***          |
| OMZ vs IND | -0.081         | -0.102   | -0.062   | <0.001          | ***          |
| OMZ vs ART | -0.006         | -0.017   | -0.001   | 0.002           | **           |
| ATL vs SOC | -0.046         | -0.131   | -0.005   | 0.0012          | **           |
| ATL vs IND | -0.049         | -0.071   | -0.029   | <0.001          | ***          |
| ATL vs ART | 0.027          | 0.015    | 0.034    | <0.001          | ***          |
| SOC vs IND | -0.003         | -0.048   | 0.083    | 0.912           | ns           |
| SOC vs ART | 0.072          | 0.032    | 0.16     | <0.001          | ***          |
| IND vs ART | 0.075          | 0.053    | 0.097    | <0.001          | ***          |

**Table S8: Robust two-sample comparisons of PIC and POC values along with PIC:POC ratios between the two OMZ layers using 10 % trimmed means. Reported values include test statistics, 95 % confidence intervals, *p*-values, and significance levels (*p* < 0.05 marked with asterisks).**

| Variable | Test statistic | CI_lower | CI_upper | <i>p</i> -value | Significance |
|----------|----------------|----------|----------|-----------------|--------------|
| PIC      | 3.676          | 0.334    | 1.075    | 0.0016          | **           |
| POC      | 4.519          | 44.995   | 132.574  | <0.001          | ***          |
| PIC:POC  | -2.298         | -0.006   | -0.001   | 0.0174          | *            |

Supplementary Section S2. Figures

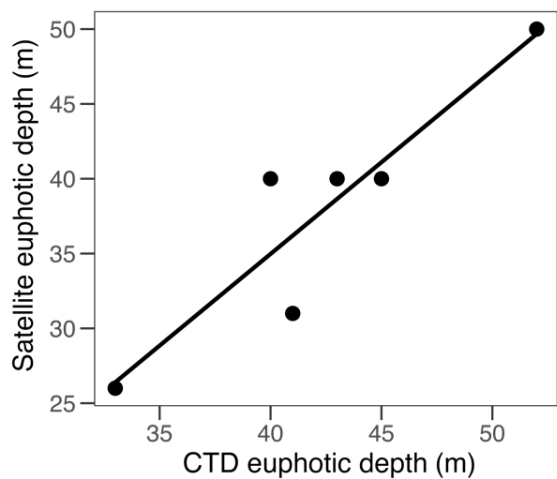

Figure S1: Comparison between euphotic depth derived from satellite observations and from PAR obtained with a sensor attached to the CTD. The solid black line represents the fitted linear regression.

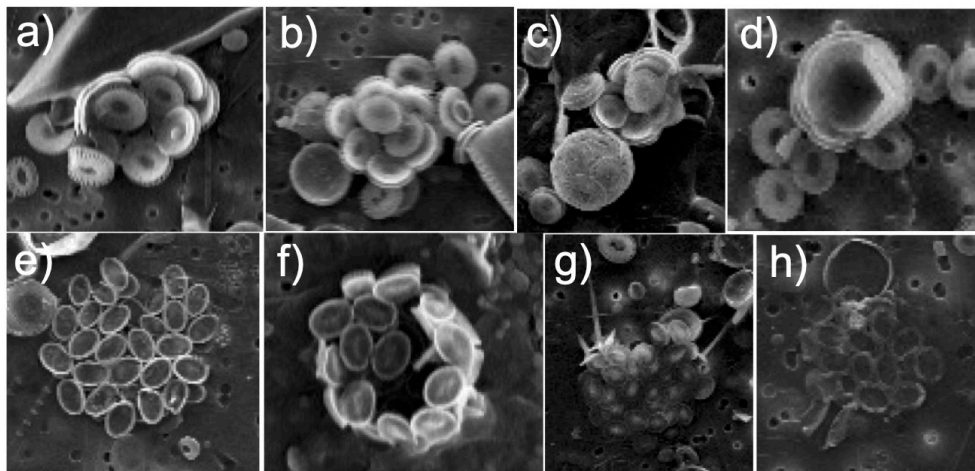

Figure S2: Zoom of scanning electron microscopy images showing layers of coccoliths detached from *G. huxleyi* (a-c), as well as, collapsed coccospheres of different species with distinct brightness (d-h).



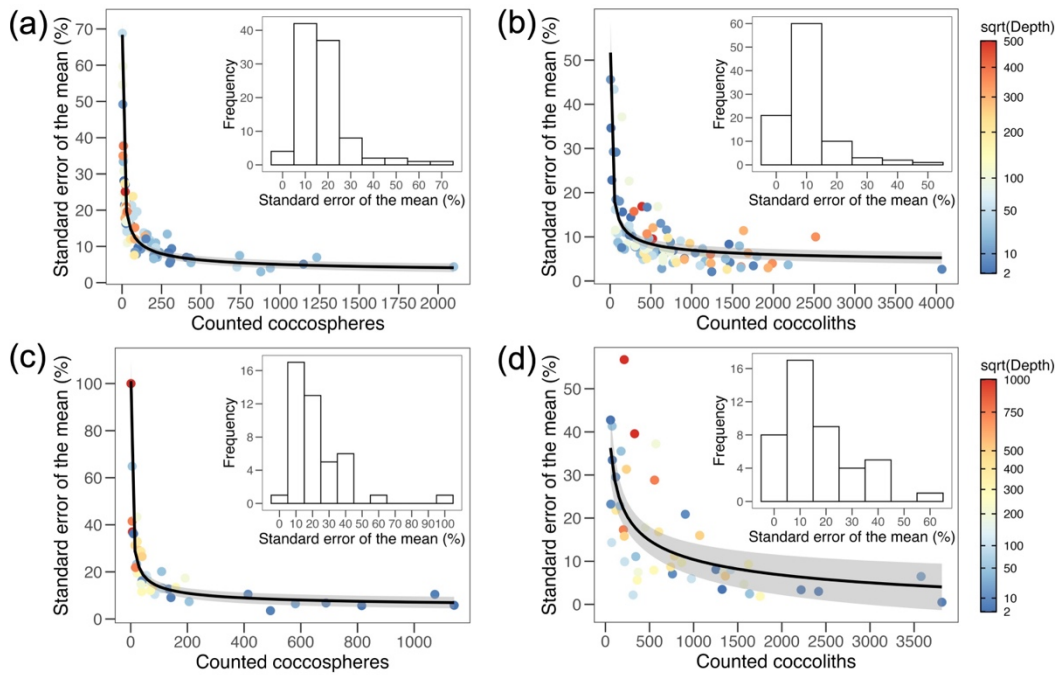

**Figure S3: Relationship across depth between the total coccospheres and detached coccoliths counted for each sample, with the standard error of the mean (SE, in %) calculated from images of the same sample. Cross-polarized light microscopy (a-b) and scanning electron microscopy (c-d). Inset histograms show the frequency distribution of SE values. The solid black line represents the fitted hyperbolic curve, with shaded grey areas indicating the 95% confidence intervals. Counts and SEs showed a significant hyperbolic relationship for coccospheres (a)  $y = 2.070 (\pm 0.655) + 93.779 (\pm 3.301) 1/x^{0.5}$ ;  $R^2_{\text{adjusted}} = 0.89$ ;  $p\text{-value}_{\text{slope, constant}} < 0.05$ , and detached coccoliths obtained with cross-polarized light microscopy (b)  $y = 3.569 (\pm 0.771) + 107.676 (\pm 9.141) 1/x^{0.5}$ ;  $R^2_{\text{adjusted}} = 0.59$ ;  $p\text{-value}_{\text{slope, constant}} < 0.05$ , as well as, coccospheres (c)  $y = 4.091 (\pm 1.318) + 96.968 (\pm 5.284) 1/x^{0.5}$ ;  $R^2_{\text{adjusted}} = 0.89$ ;  $p\text{-value}_{\text{slope, constant}} < 0.05$ , and detached coccoliths obtained with scanning electron microscopy (d)  $y = -8.785 (\pm 4.714) + 152.344 (\pm 27.065) 1/x^{0.3}$ ;  $R^2_{\text{adjusted}} = 0.42$ ;  $p\text{-value}_{\text{slope}} < 0.05$ .**

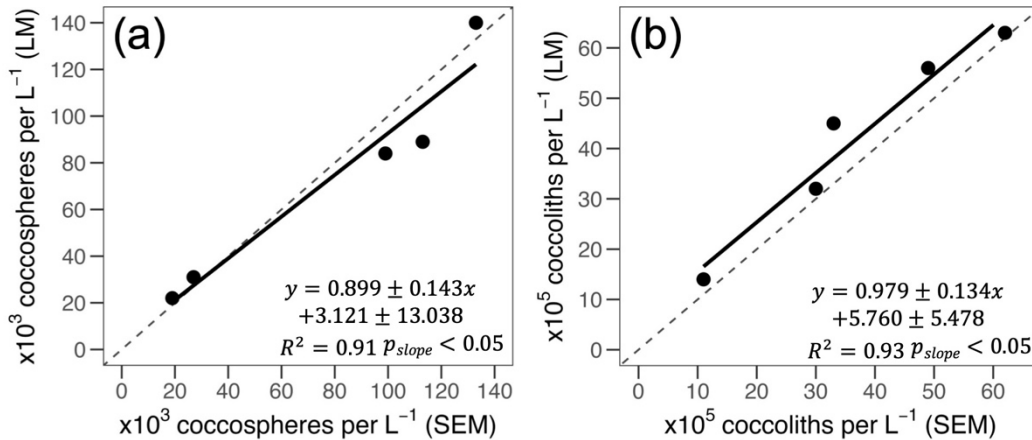

**Figure S4: Linear relationships for coccosphere counts (a) and detached coccolith counts (b) obtained through Scanning Electron Microscopy (SEM) and cross-polarized light microscopy (LM). The dotted line represents the 1:1 relationship, while the solid black line and shaded grey areas depict the empirical trend and 95 % confidence intervals.**

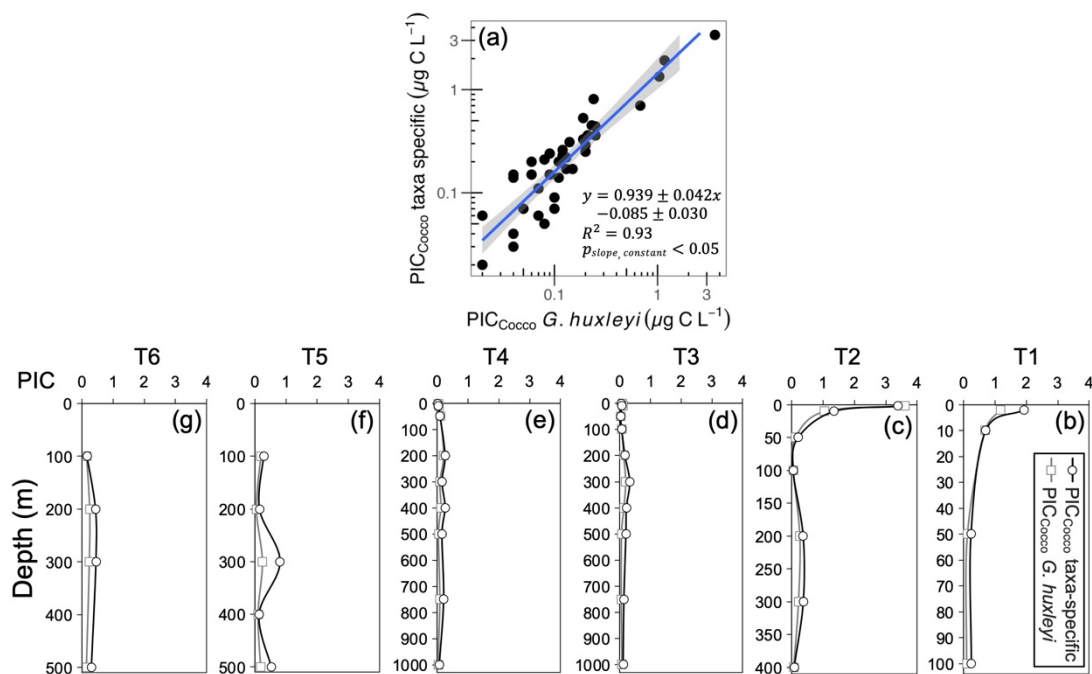

Figure S5: Scatterplot (a) and depth profiles (b-g) comparing  $PIC_{Cocco}$  estimates derived from *G. huxleyi* coccolith mass conversion versus taxon-specific shape factors along the 2015 inshore-offshore transect. PIC values are expressed in  $\mu g L^{-1}$ . The solid blue line in scatterplot (a), shown on a log-log scale, represents the fitted linear regression, with shaded grey areas indicating the 95% confidence intervals.

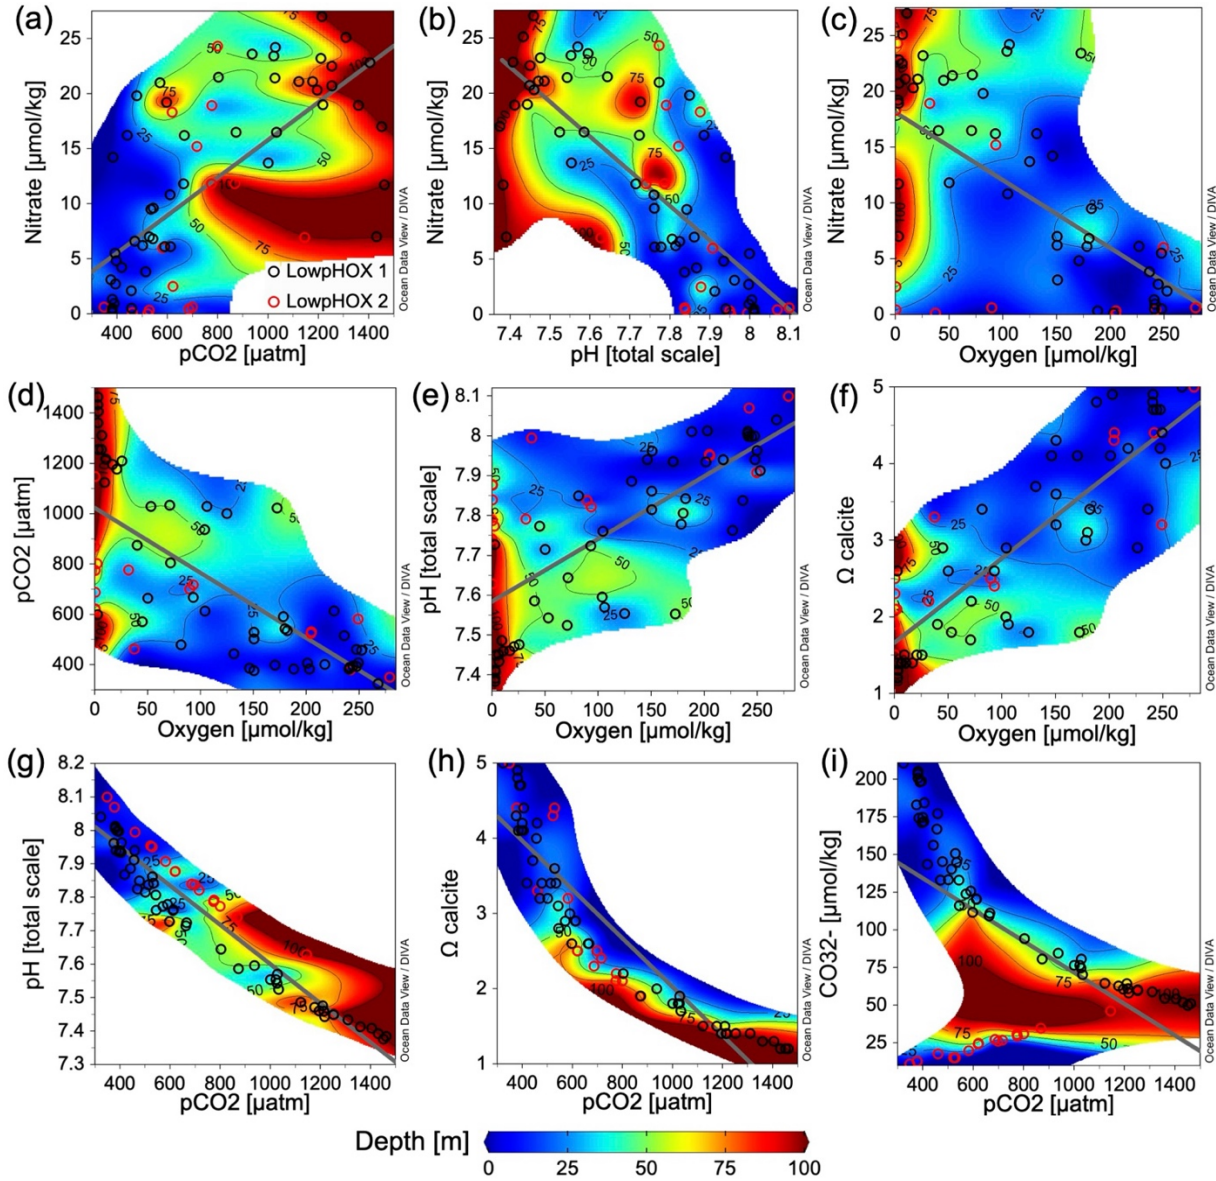

Figure S6: Variation in nitrate vs  $p\text{CO}_2$  (a), pH (b), and  $\text{O}_2$  (c), along with variation in  $\text{O}_2$  vs  $p\text{CO}_2$  (d), pH (e), and  $\Omega_{\text{calcite}}$  (f), plus  $p\text{CO}_2$  vs pH (g),  $\Omega_{\text{calcite}}$  (h), and carbonate ion (i) within 100 m depth during late-spring 2015 (open black dots) and mid-summer 2018 (open red dots). The gray line depicts the least-square model fit curve.  $p\text{CO}_2$  vs nitrate  $y = 0.0171 (\pm 0.00036)x - 1.335 (\pm 0.298)$ ;  $R^2 = 0.68$ ;  $n = 67$ . pH vs nitrate  $y = -31.366 (\pm 0.593)x + 254.5 (\pm 4.59)$ ;  $R^2 = 0.76$ ;  $n = 67$ .  $\text{O}_2$  vs nitrate  $y = -0.061 (\pm 0.00137)x + 18.12 (\pm 0.195)$ ;  $R^2 = 0.65$ ;  $n = 62$ .  $\text{O}_2$  vs  $p\text{CO}_2$   $y = -2.582 (\pm 0.00129)x + 1023 (\pm 0.194)$ ;  $R^2 = 0.74$ ;  $n = 66$ .  $\text{O}_2$  vs pH  $y = 0.00157 (\pm 0.00129)x + 7.584 (\pm 0.194)$ ;  $R^2 = 0.73$ ;  $n = 66$ .  $\text{O}_2$  vs  $\Omega_{\text{calcite}}$   $y = 0.011 (\pm 0.0013)x + 1.66 (\pm 0.194)$ ;  $R^2 = 0.86$ ;  $n = 66$ .  $p\text{CO}_2$  vs pH  $y = -0.00059 (\pm 0.00035)x + 8.186 (\pm 0.282)$ ;  $R^2 = 0.96$ ;  $n = 71$ .  $p\text{CO}_2$  vs  $\Omega_{\text{calcite}}$   $y = -0.00324 (\pm 0.00035)x + 5.26 (\pm 0.282)$ ;  $R^2 = 0.91$ ;  $n = 71$ .  $p\text{CO}_2$  vs carbonate ion  $y = -0.104 (\pm 0.00035)x + 176 (\pm 0.282)$ ;  $R^2 = 0.58$ ;  $n = 71$ .

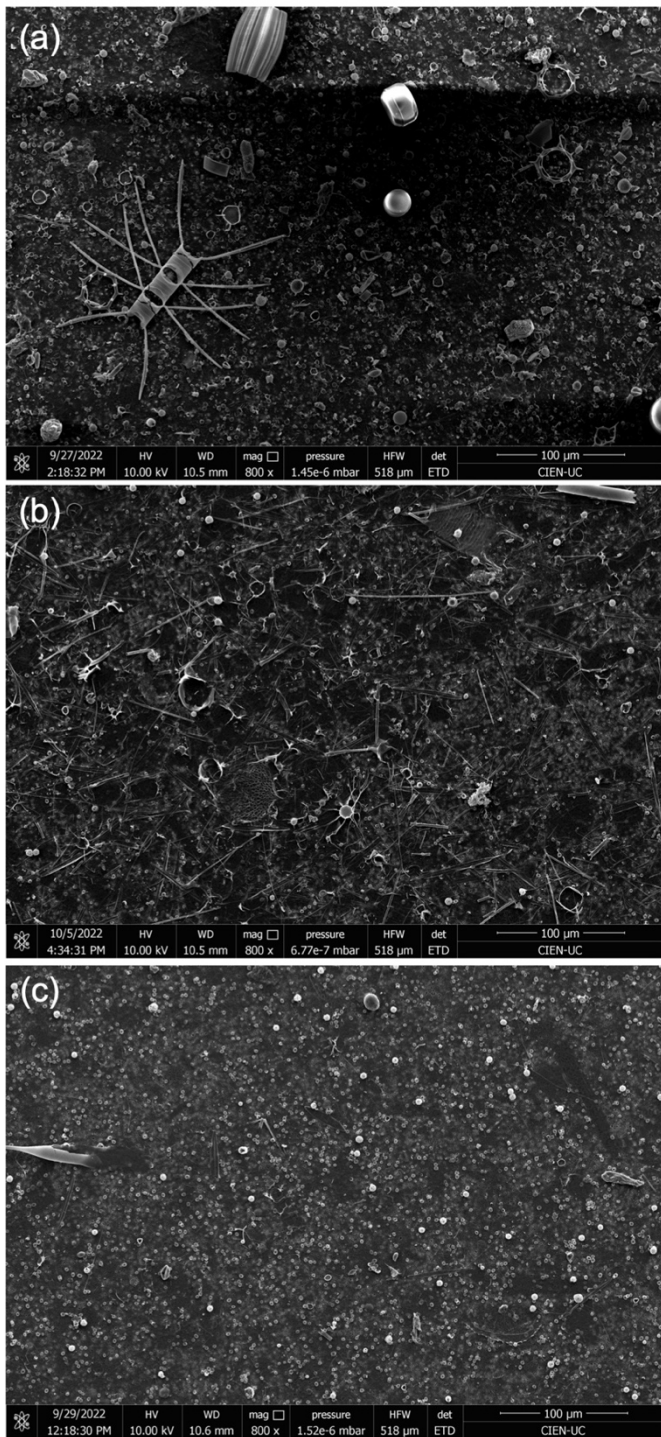

Figure S7: Scanning electron microscopy showing diverse coccolithophore and diatom assemblages in 2015 station T1 at 2 m depth (a) as well the dominance of coccospheres and detached-coccoliths of *G. huxleyi* during post-bloom of diatoms in 2015 station L2 at 5 m depth (b) and under low biomass conditions in 2015 station L3 at 5 m depth (c). Each 800x frame corresponds to 0.2 mm<sup>2</sup>.

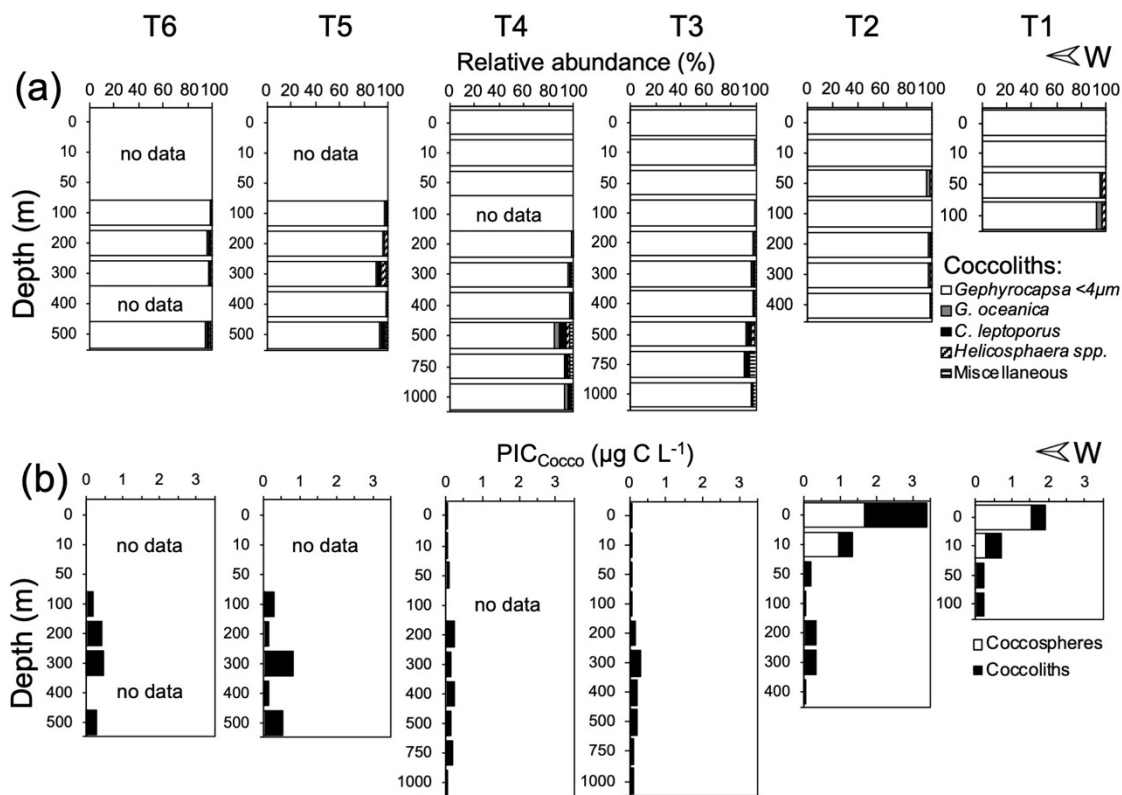

**Figure S8: Relative abundances of detached coccoliths (a) and contribution of coccospheres and detached coccoliths to the total PIC<sub>Cocco</sub> pool (b) in waters off Iquique (20° S) during late-spring 2015. In panels (b) the PIC<sub>Cocco</sub> pool estimate is derived from abundances obtained through scanning electron microscopy.**

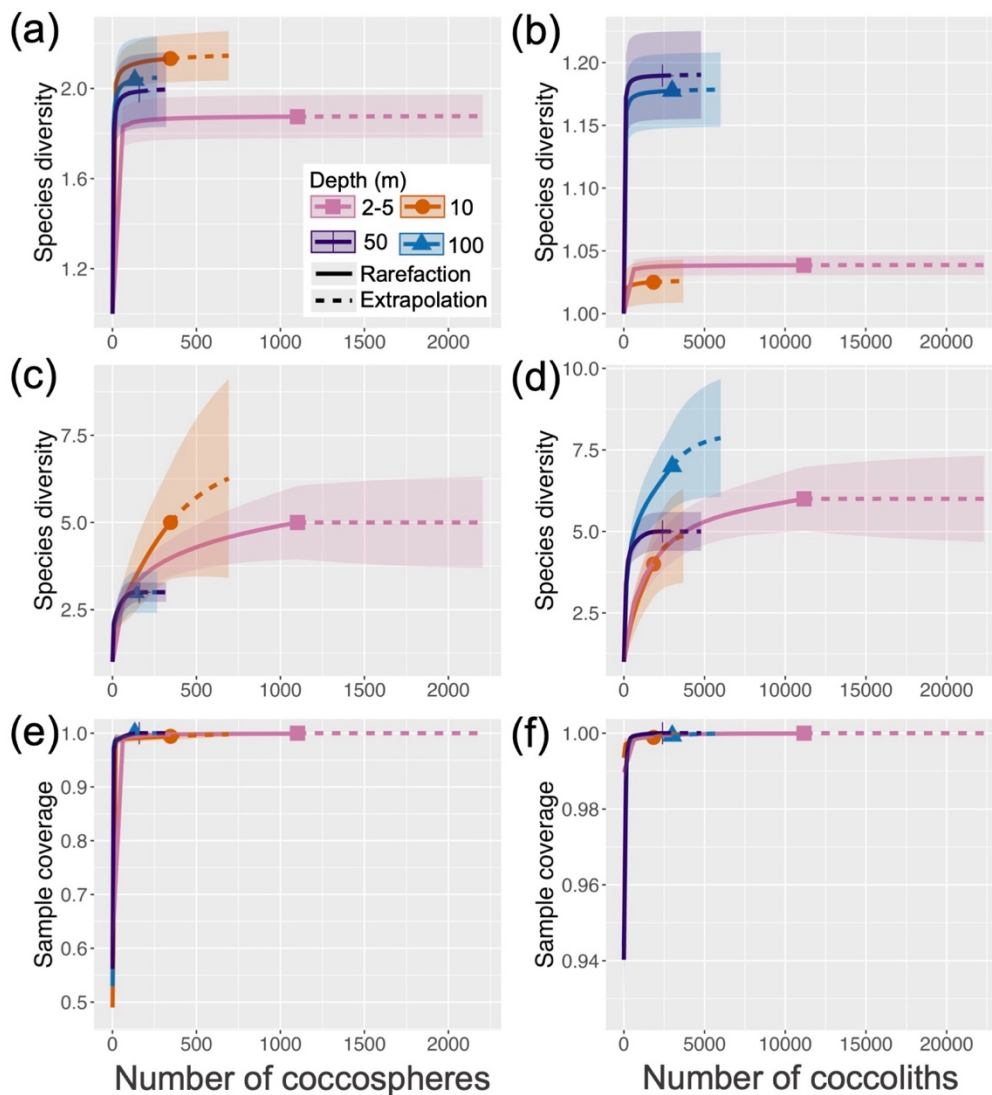

**Figure S9:** Rarefaction-extrapolation analysis for late-spring 2015 and mid-summer 2018, showing species richness (a-b), the exponential of Shannon entropy (c-d), and sample completeness (e-f) for coccospheres and detached coccoliths observed at 2-5, 10, 50, and 100 m. Each curve in plots a-d includes 95 % confidence intervals.



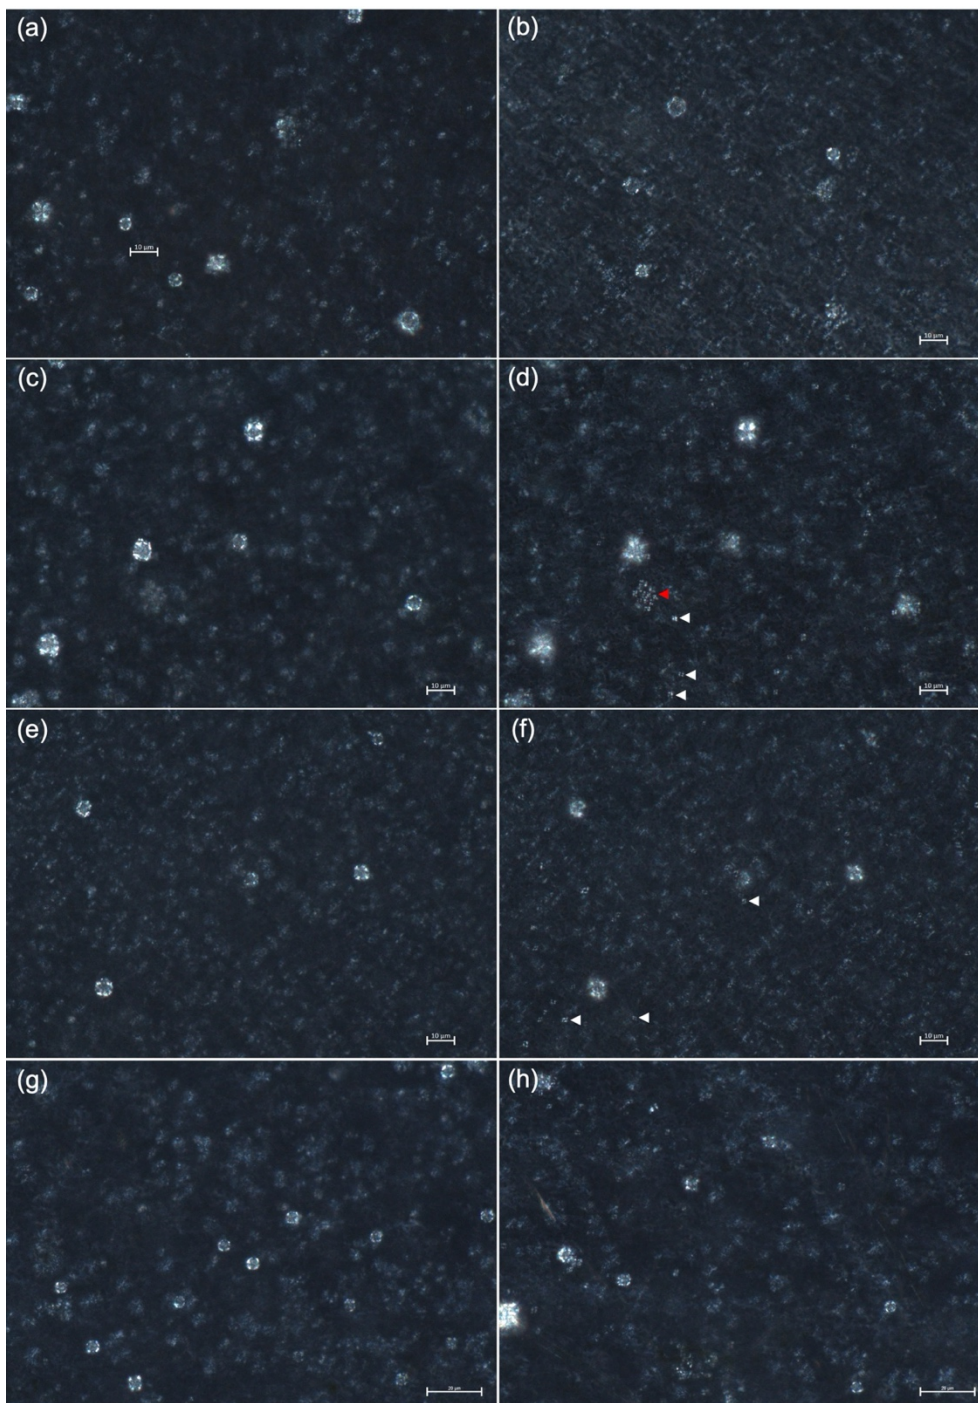

Figure S10: Cross-polarized light microscopy showing coccospheres and detached coccoliths of *G. huxleyi* dominating during mid-summer 2018. Images corresponding to: (a) Station Hyd3 at 25 m depth, (b) Station Hyd4 at 50 m depth, (c and d) Station Hyd6 at 10 m depth different focus, (e and f) Station Lander1 (La1) at 15 m depth with distinct focus, (g) Station T5 at 30 m depth, and (h) Station T5 at 30 m depth. Note the white arrows in (d) and (f) indicate some detached coccoliths, and red arrow in (d) a layer of coccoliths included in detached-coccoliths counts. All images taken at 630x magnification.

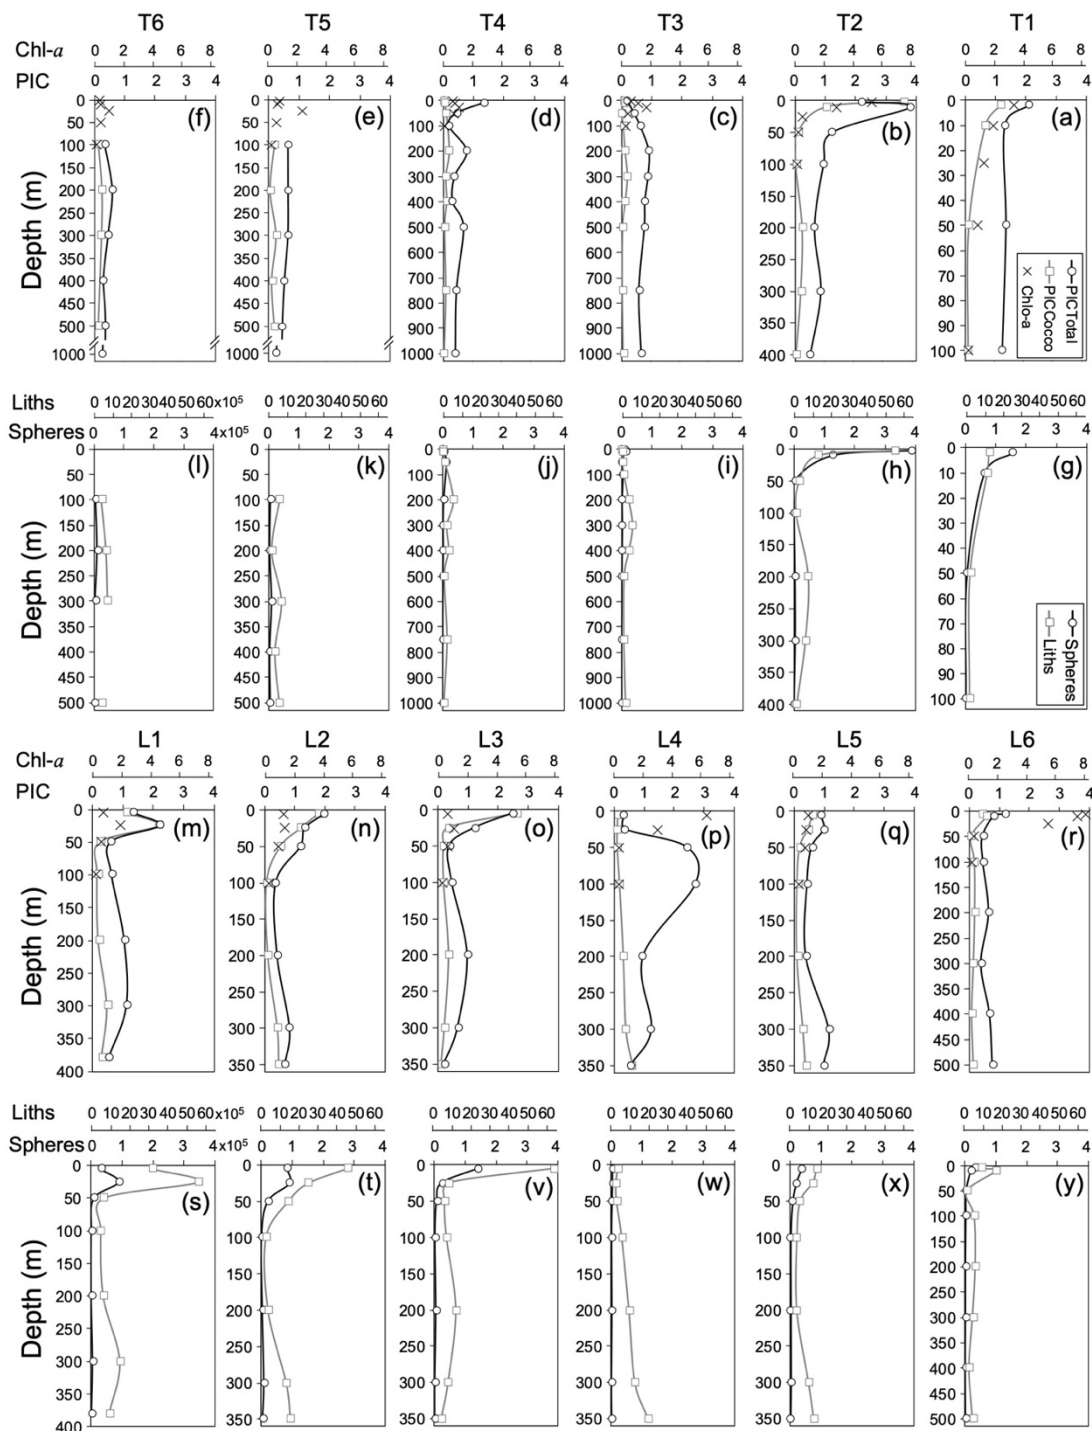

**Figure S11: Profiles of PIC<sub>Totals</sub>, PIC<sub>Cocco</sub>, Chl-a, coccospheres, and detached coccolith along the inshore-offshore transect (a-l) and the latitudinal leg (m-y) sampled in late-spring 2015. Note that the axes for each variable span the same range. Both PIC and Chl-a values are expressed in  $\mu\text{g L}^{-1}$ .**



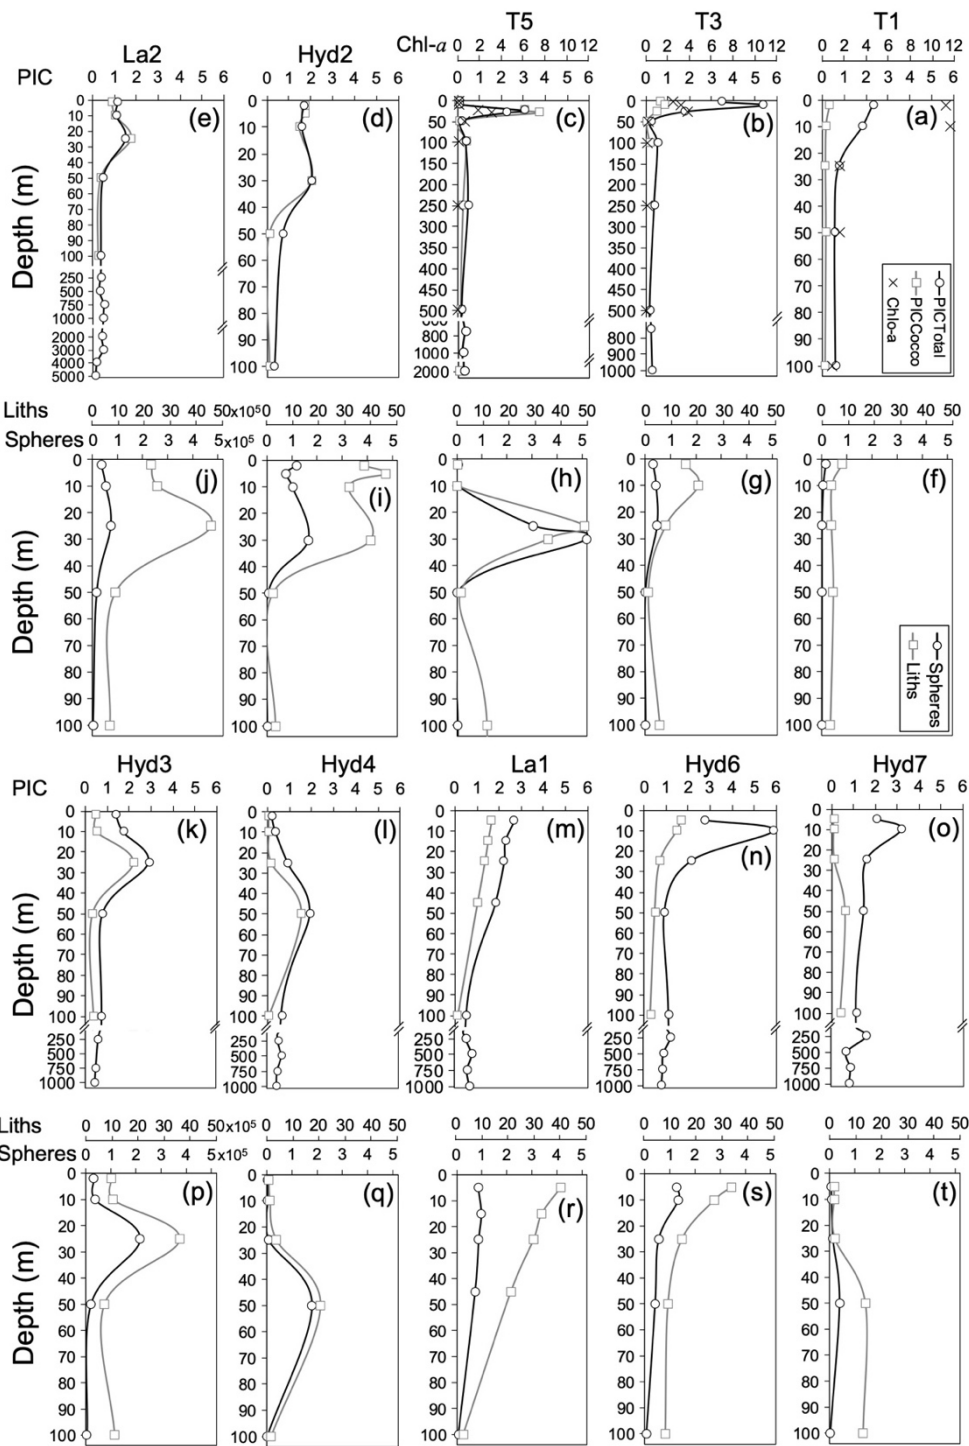

Figure S12: Profiles of  $PIC_{Total}$ ,  $PIC_{Cocco}$ ,  $Chl-a$ , coccospheres, and detached coccoliths along the inshore-offshore transect (a-c, f-h) and the latitudinal leg (d-e, i-t) sampled in mid-summer 2018. Note that the axes for each variable span the same range. Both  $PIC$  and  $Chl-a$  values are expressed in  $\mu g L^{-1}$ .

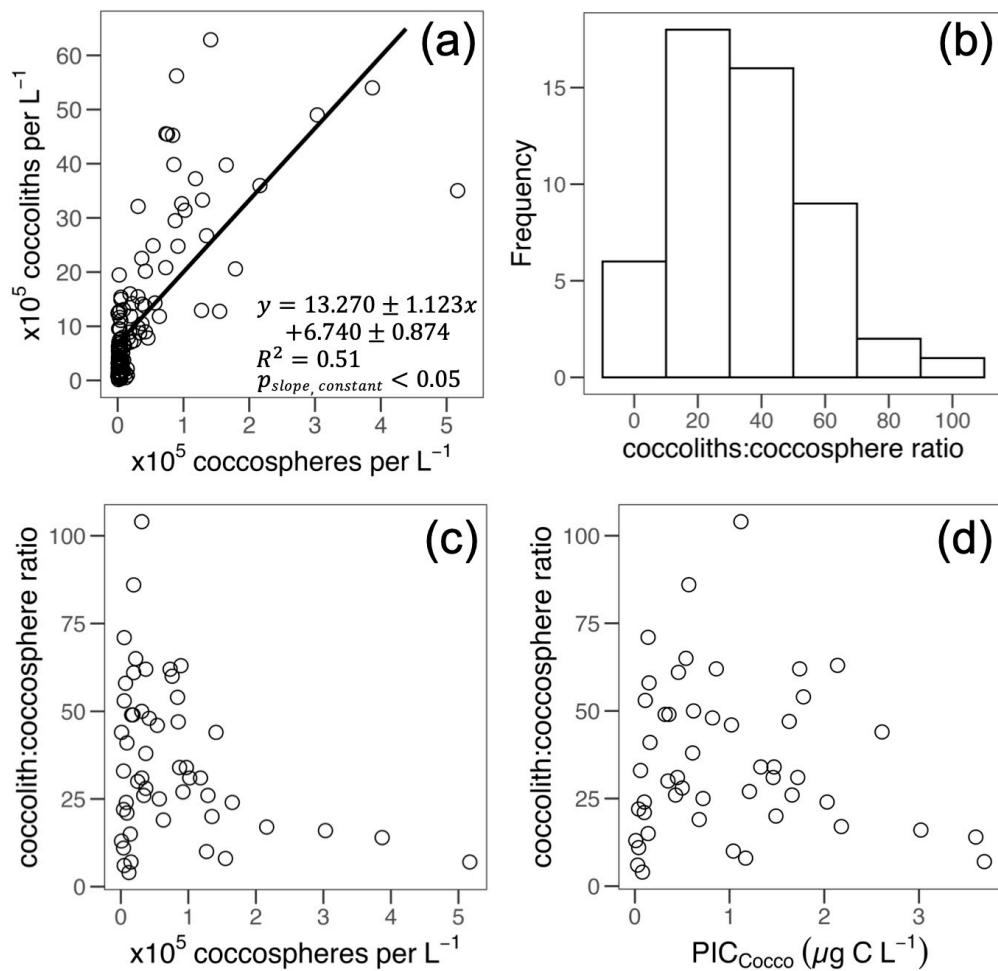

95 **Figure S13:** Linear relationship between (a) coccospheres and detached coccoliths, (b) histogram of detached coccolith-to-coccosphere ratio frequencies, and relationships between (c) coccospheres and detached coccolith-to-coccosphere ratios, and (d)  $PIC_{Cocco}$  and detached coccolith-to-coccosphere ratios recorded during late-spring 2015 and mid-summer 2018. The solid black line in (a) represents the fitted linear regression.

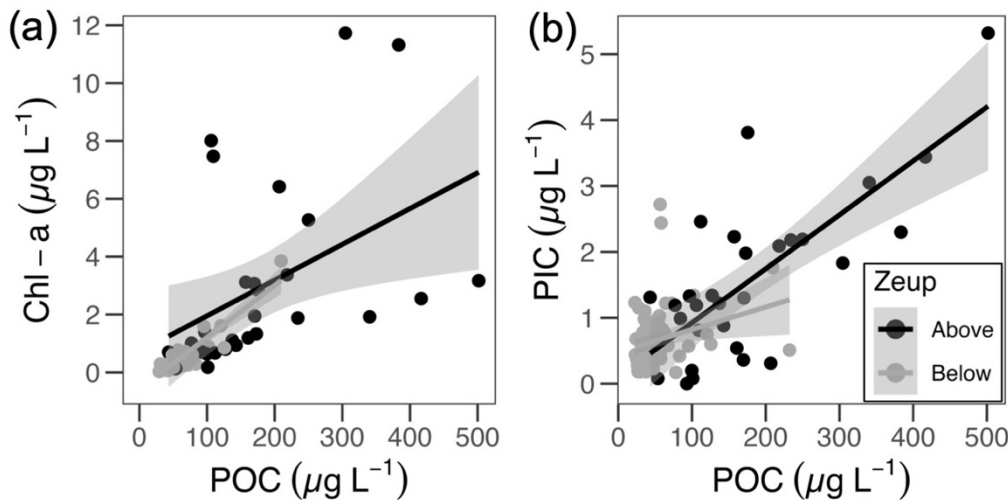

Figure S14: Chl-*a* vs POC and PIC vs POC data variation above and below the euphotic zone. The solid black lines represent the fitted linear regression, with shaded grey areas indicating the 95% confidence intervals. POC vs Chl-*a* above  $Z_{\text{eu}}$   $y = 0.012 (\pm 0.005)x + 0.717 (\pm 1.026)$ ;  $R^2_{\text{(adjusted)}} = 0.17$ ;  $p\text{-value}_{\text{(slope)}} < 0.05$ ;  $n = 29$ . POC vs Chl-*a* below  $Z_{\text{eu}}$   $y = 0.018 (\pm 0.002)x - 0.602 (\pm 0.109)$ ;  $R^2_{\text{(adjusted)}} = 0.82$ ;  $p\text{-value}_{\text{(slope, constant)}} < 0.05$ ;  $n = 32$ . POC vs PIC above  $Z_{\text{eu}}$   $y = 0.008 (\pm 0.001)x + 0.106 (\pm 0.298)$ ;  $R^2_{\text{(adjusted)}} = 0.54$ ;  $p\text{-value}_{\text{(slope)}} < 0.05$ ;  $n = 29$ . POC vs PIC below  $Z_{\text{eu}}$   $y = 0.003 (\pm 0.001)x + 0.478 (\pm 0.088)$ ;  $R^2_{\text{(adjusted)}} = 0.06$ ;  $p\text{-value}_{\text{(slope, constant)}} < 0.05$ ;  $n = 76$ .

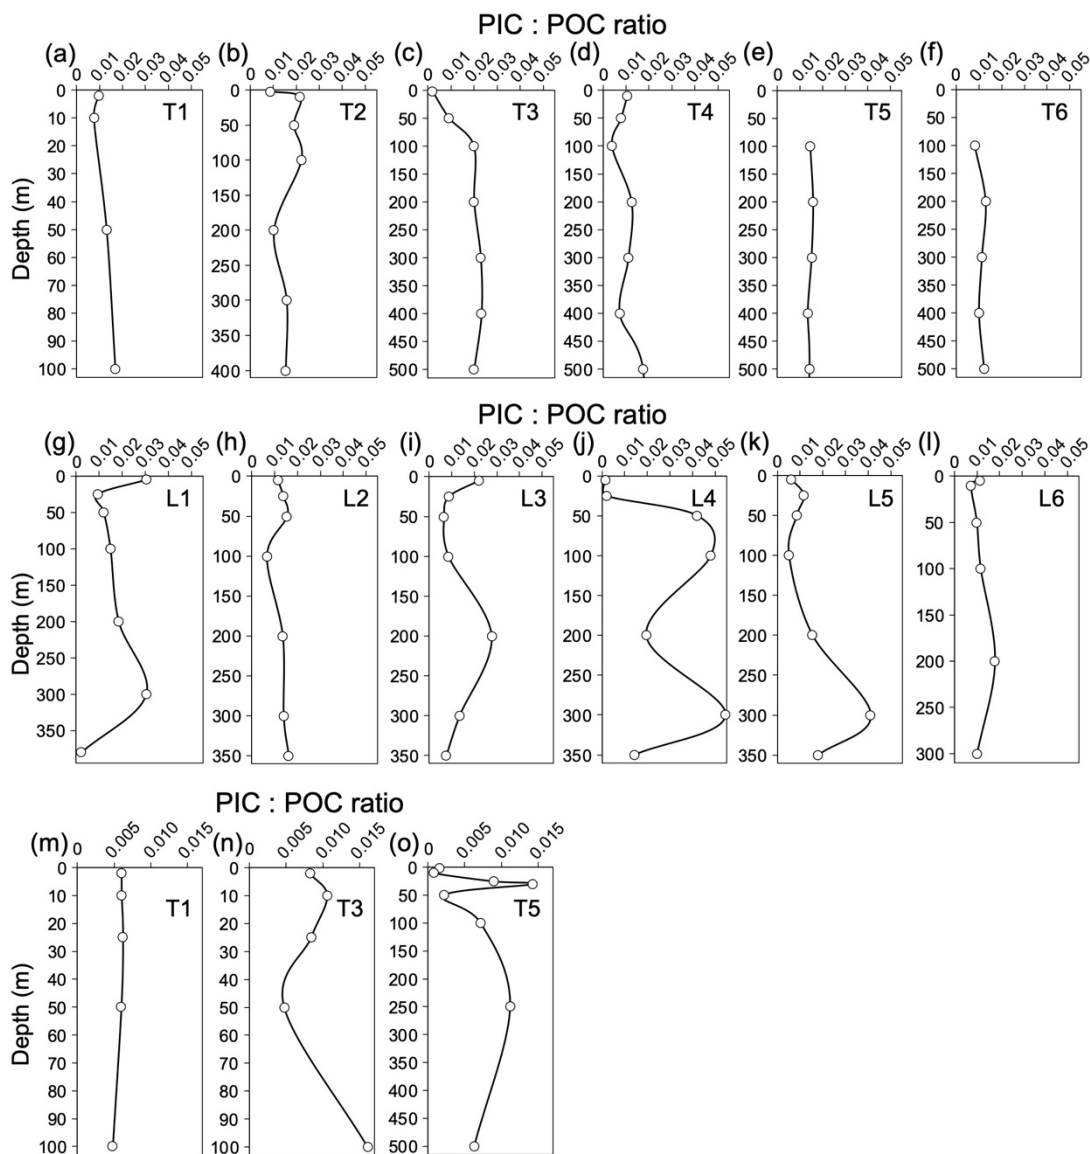

**Figure S15: Profiles of PIC:POC ratios across the inshore-offshore transect (a-f) and latitudinal leg (g-l) sampled in late-spring 2015, as well as across the inshore-offshore transect (m-o) sampled in mid-summer 2018.**

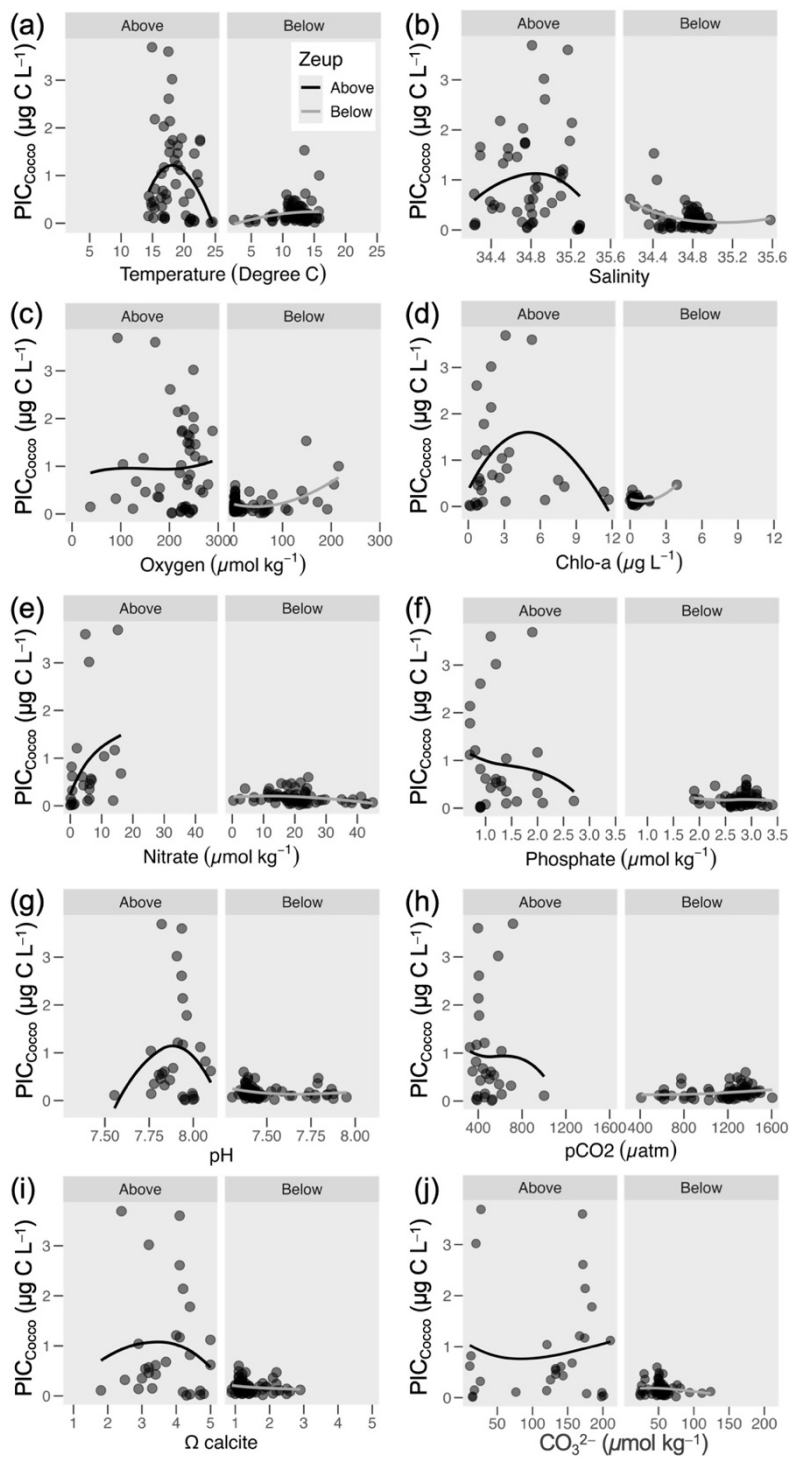

110 **Figure S16: Variation in  $PIC_{Cocco}$  above and below the euphotic zone across environmental conditions during late-spring 2015 and mid-summer 2018. Temperature (a), Salinity (b),  $O_2$  (c),  $Chl-a$  (d), nitrate (e), phosphate (f), pH (g),  $pCO_2$  (h),  $\Omega_{calcite}$  (i), and carbonate ion (j) are shown.**

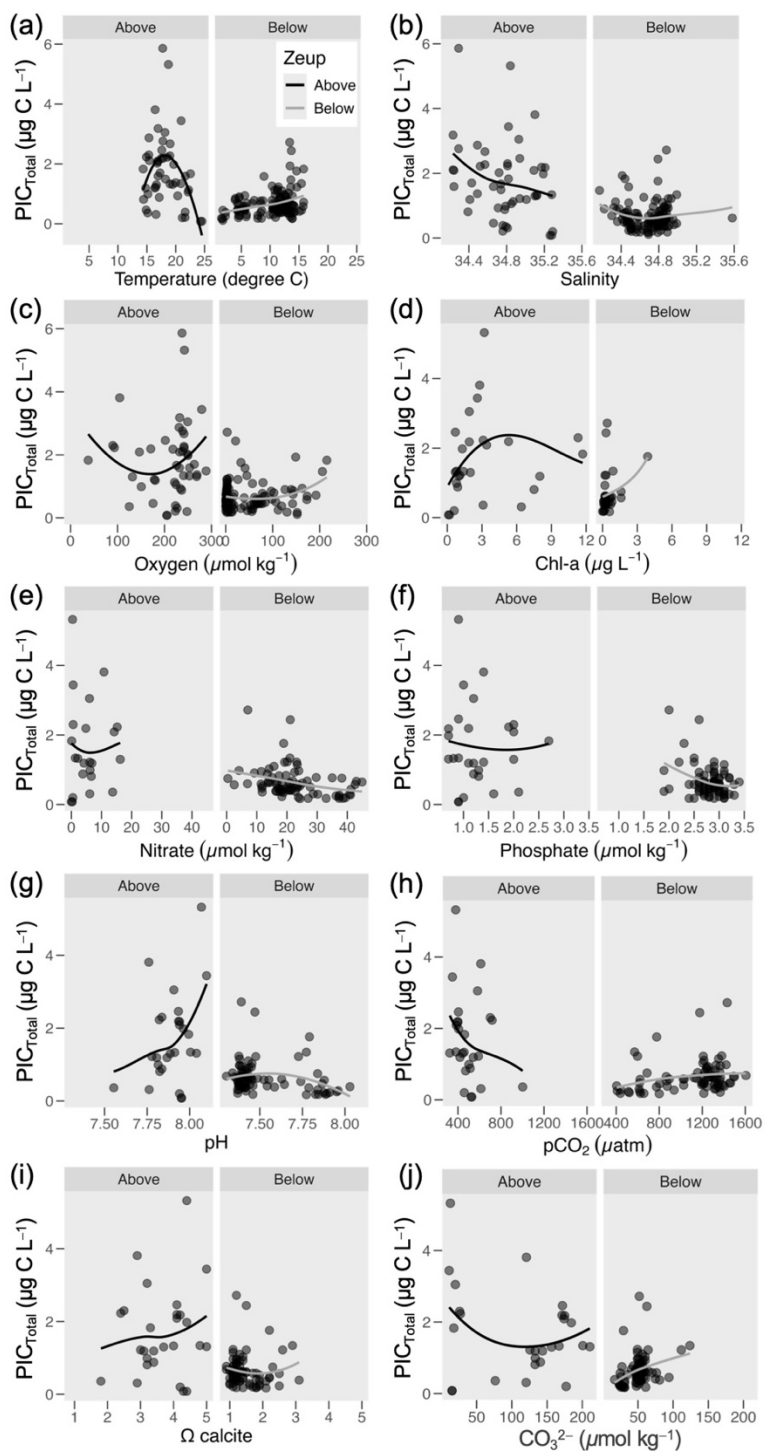

**Figure S17: Variation in  $PIC_{Total}$  above and below the euphotic zone across environmental conditions during late-spring 2015 and mid-summer 2018. Temperature (a), Salinity (b),  $O_2$  (c), Chl-a (d), nitrate (e), phosphate (f), pH (g),  $pCO_2$  (h),  $\Omega_{calcite}$  (i), and carbonate ion (j) are shown.**
